# Supplementary material for: Molecular interactions between Geobacter sulfurreducens triheme cytochromes and the electron acceptor Fe(iii) citrate studied by NMR
Source: Royal Society of Chemistry journal article supplement (doi:10.1039/c6dt04129a), 2017-01-01
Supplement: c6dt04129a1.pdf [file c6dt04129a1.pdf]

## Electronic Supplementary Information

### **Molecular interactions between *Geobacter sulfurreducens* triheme cytochromes and the electron acceptor Fe(III) citrate studied by NMR**

Marisa R. Ferreira<sup>a</sup>, Joana M. Dantas<sup>a</sup>, Carlos A. Salgueiro<sup>a,\*</sup>

<sup>a</sup> UCIBIO-Requimte, Departamento de Química, Faculdade de Ciências e Tecnologia,  
Universidade NOVA de Lisboa, Campus Caparica, 2829-516 Caparica, Portugal

\*Corresponding author: [csalgueiro@fct.unl.pt](mailto:csalgueiro@fct.unl.pt)

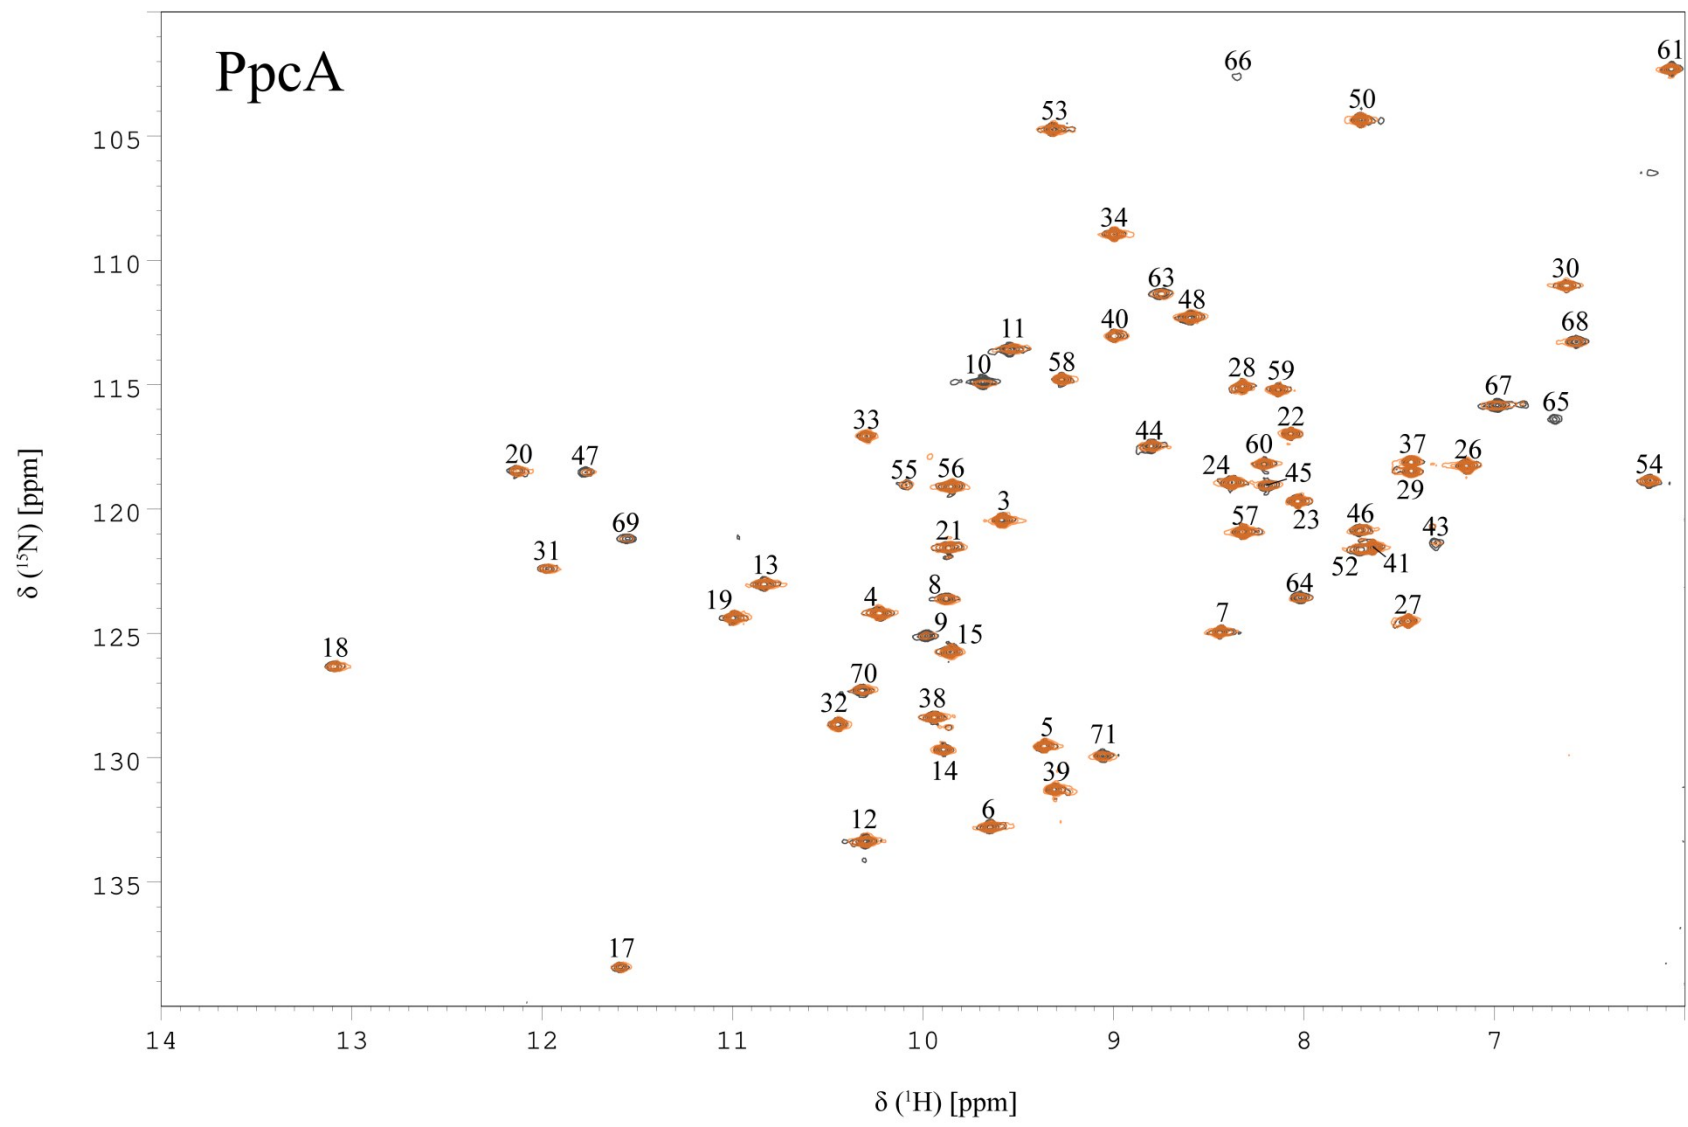

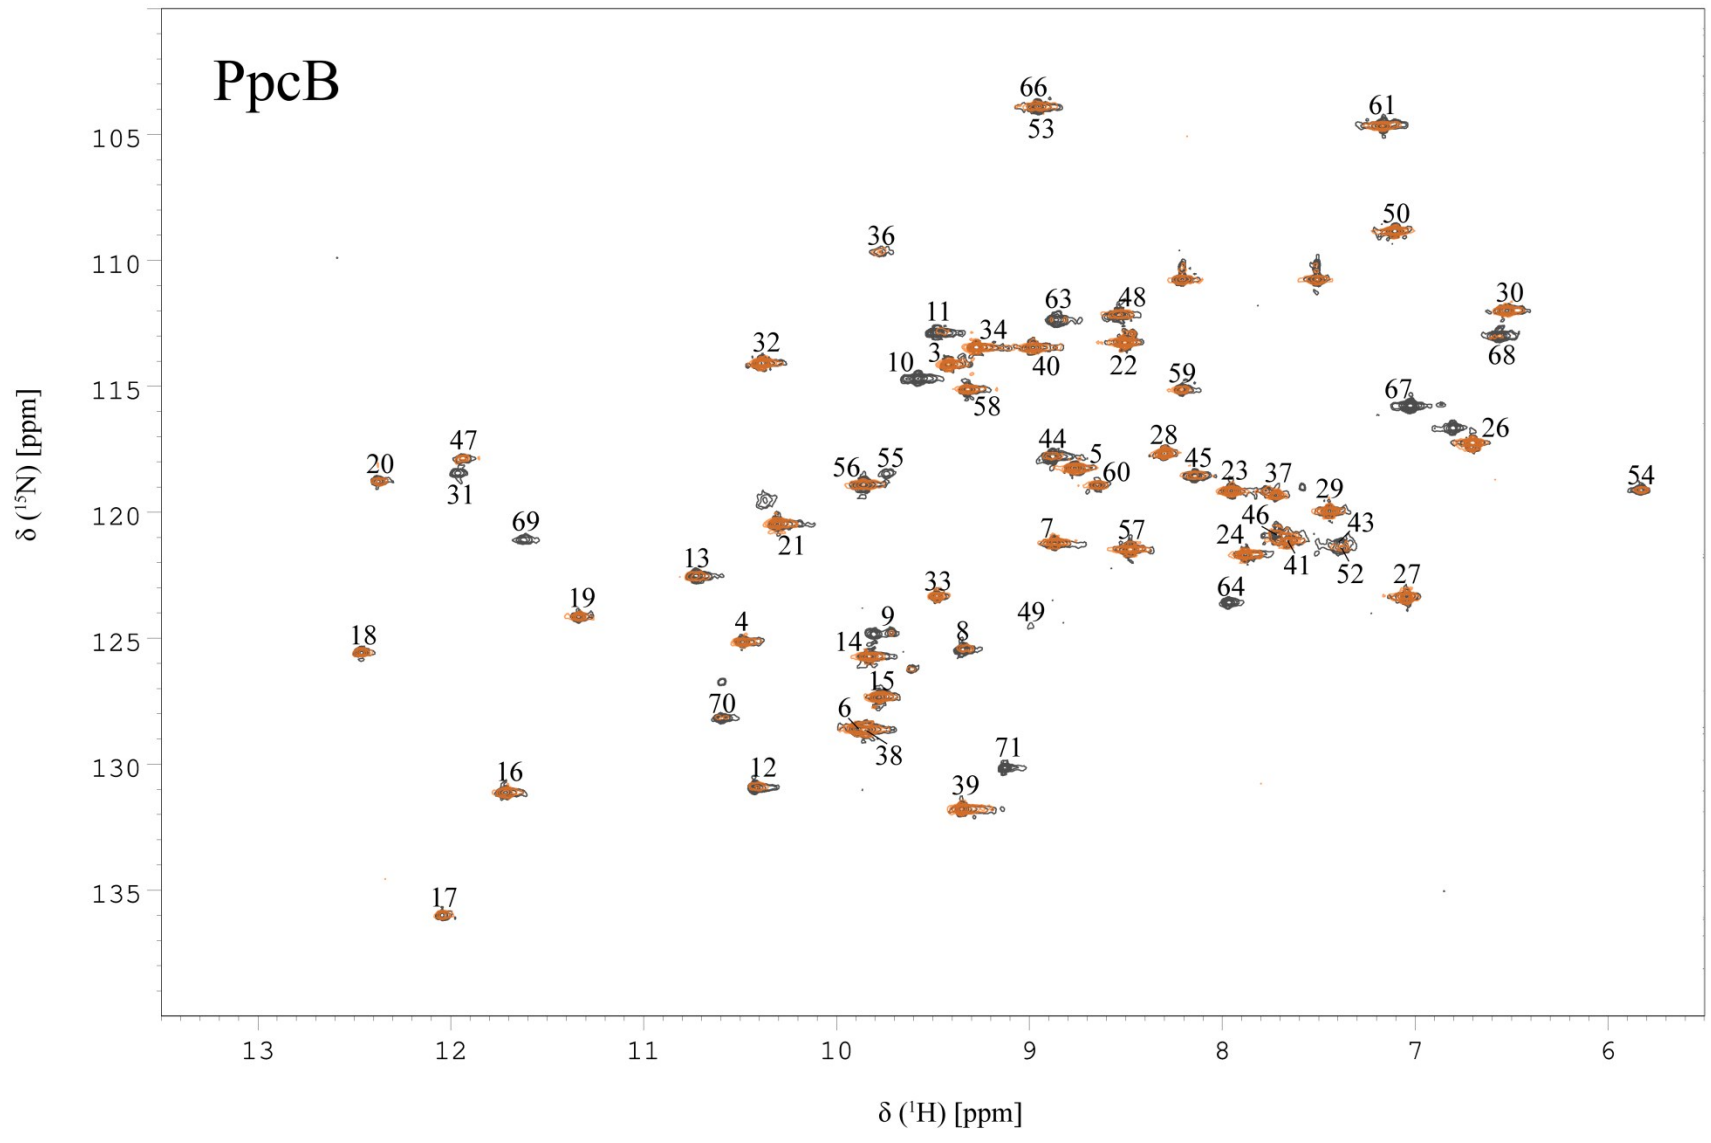

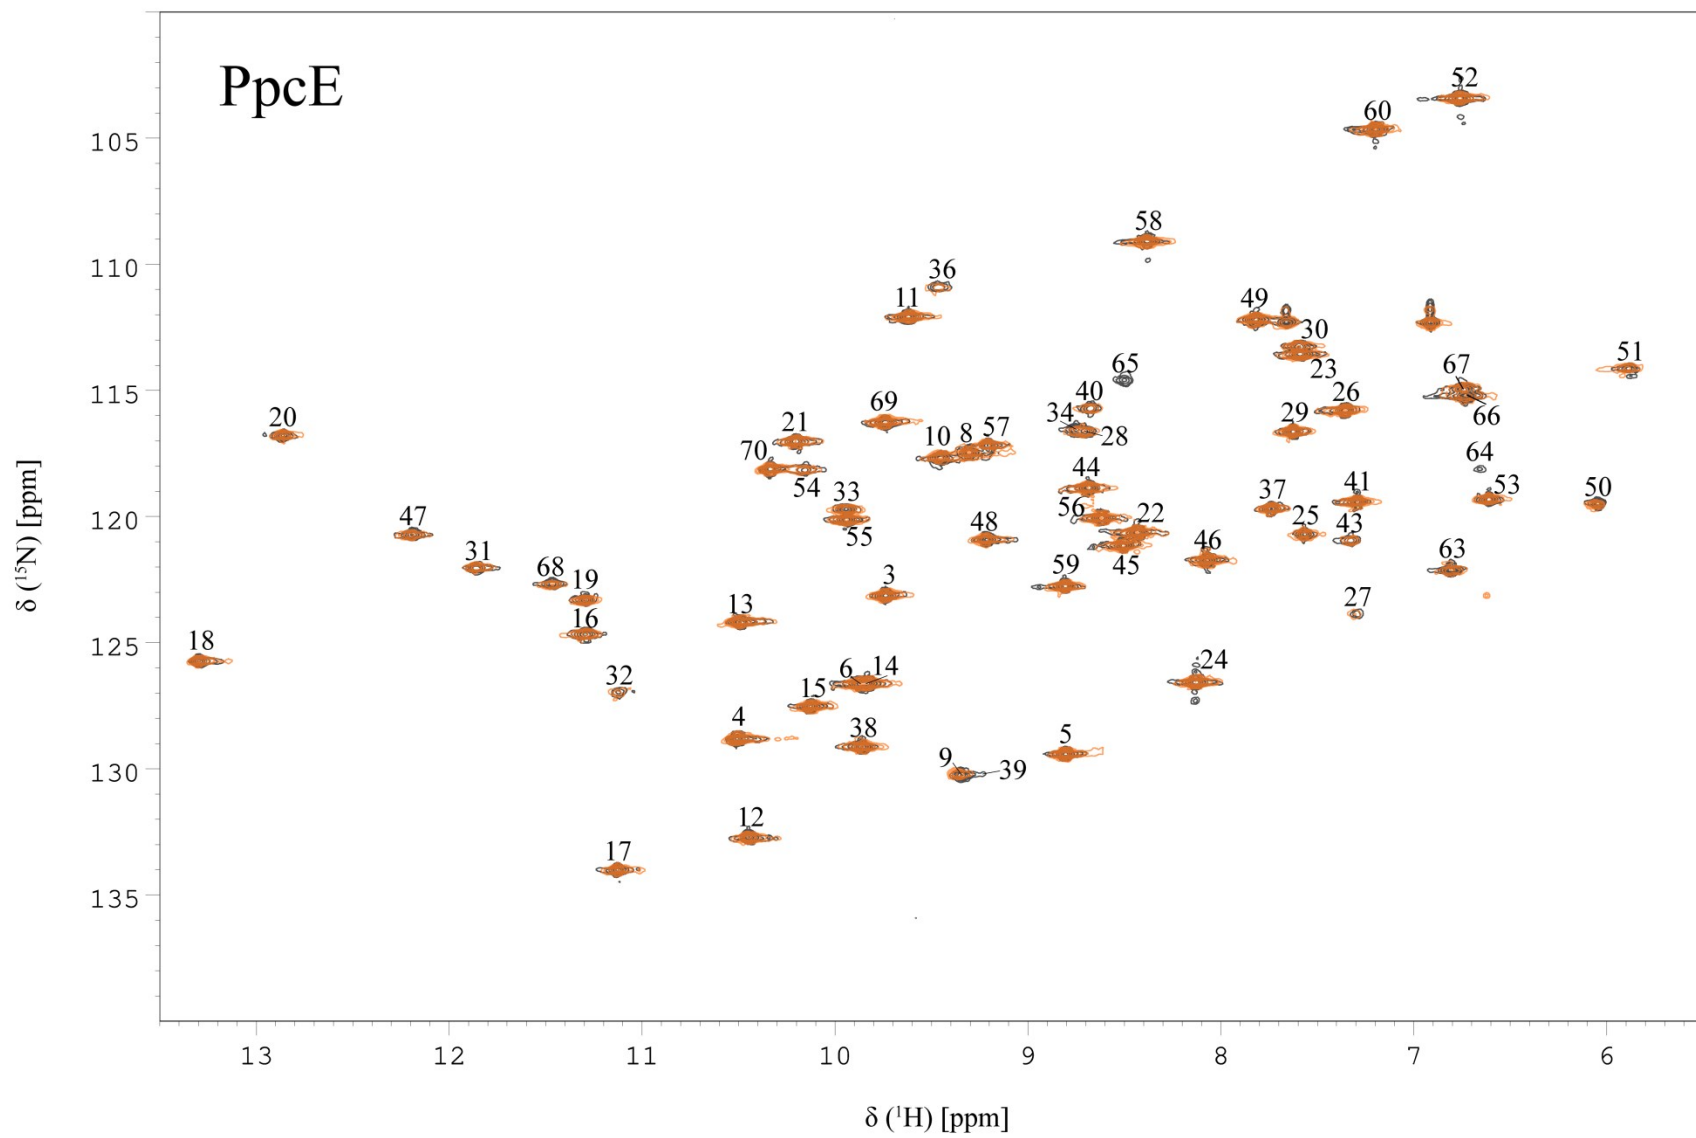

**Fig. S1** Overlay of the 2D  $^1\text{H},^{15}\text{N}$  HSQC NMR spectra of  $^{15}\text{N}$ -enriched PpcA, PpcB and PpcE in the absence (black) and in the presence (orange) of Fe(III) citrate. The assignments of the NH signals are indicated.

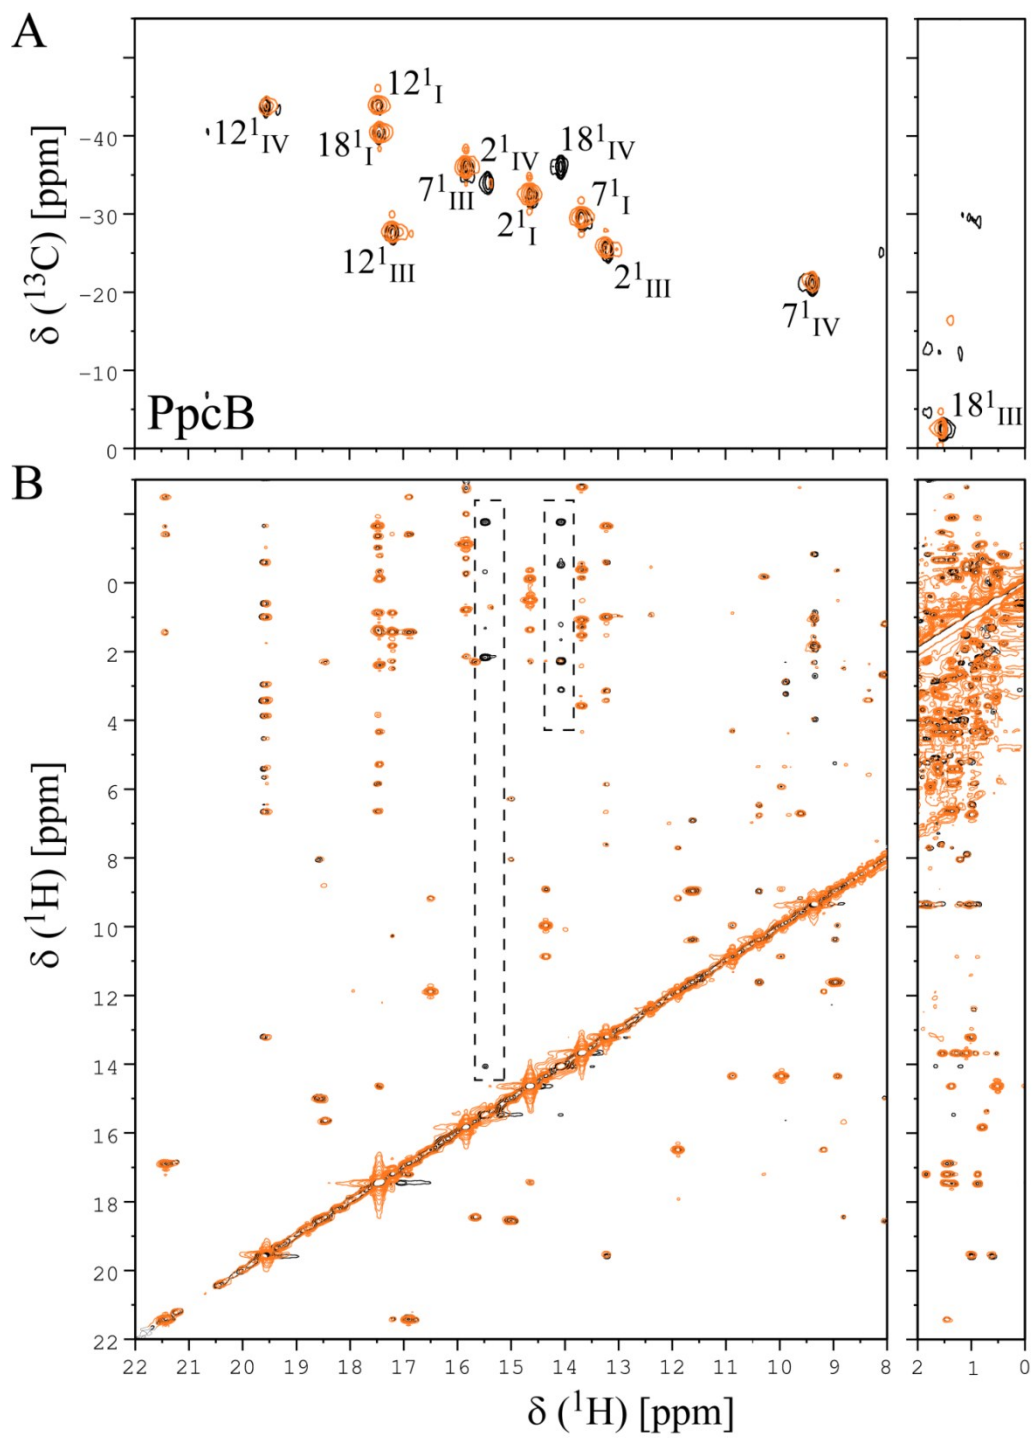

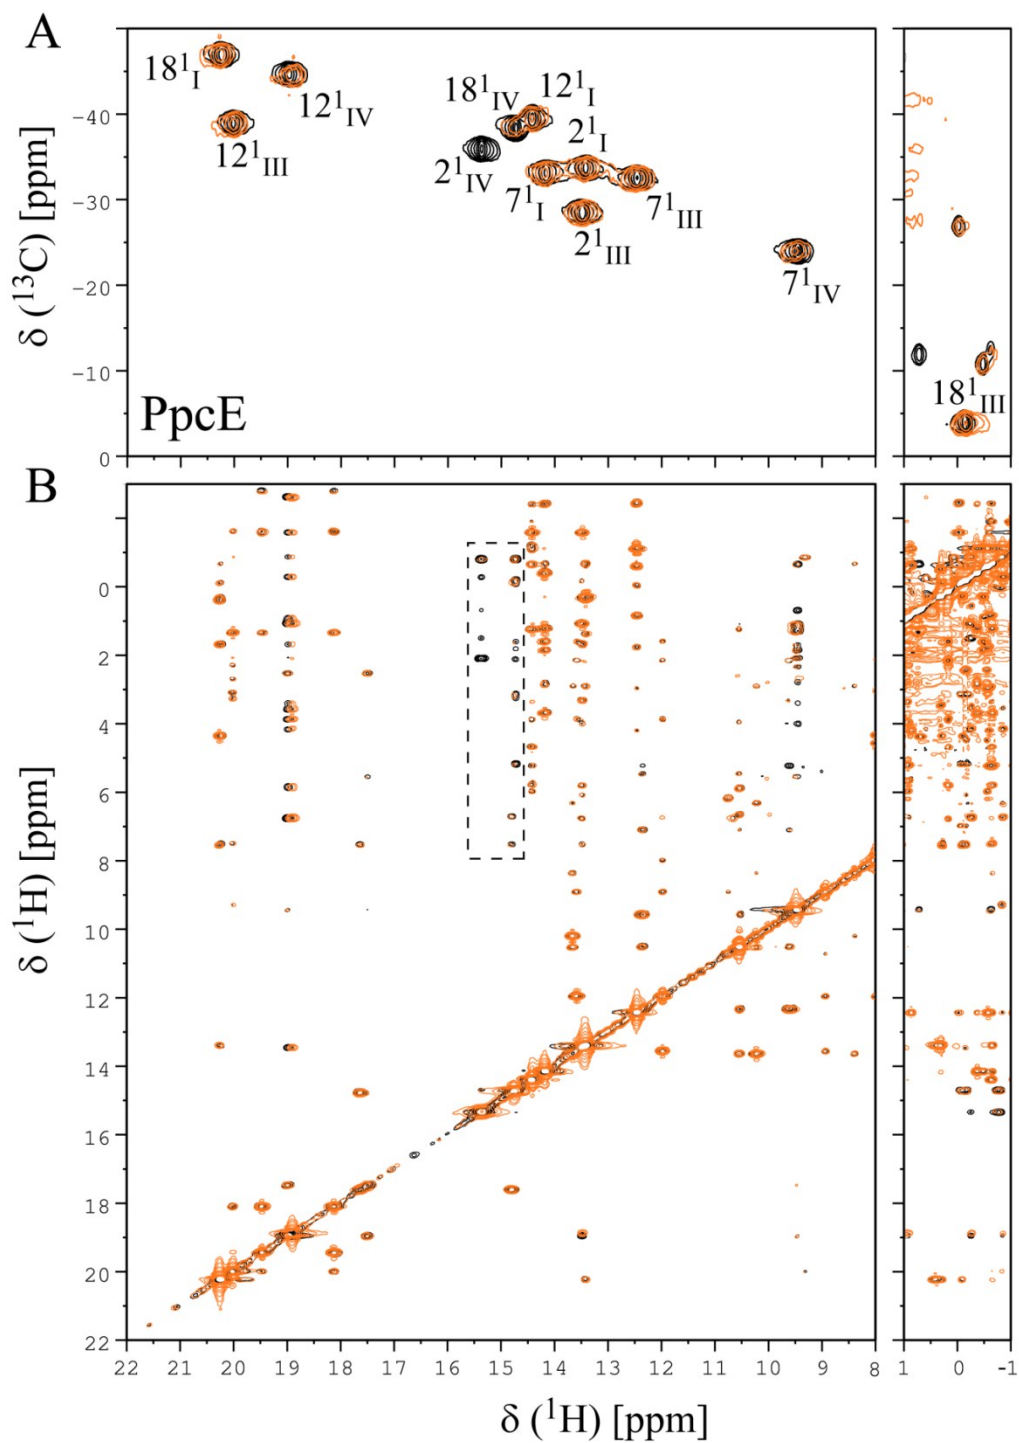

**Fig. S2** Selected regions of 2D  $^1\text{H},^{13}\text{C}$  HMQC (A) and 2D  $^1\text{H}$  NOESY (B) NMR spectra of PpcB and PpcE in the absence (black) and presence (orange) of Fe(III) citrate. The dashed rectangles show the NOE connectivities of heme methyls  $2^1\text{CH}_3^{\text{IV}}$  and  $18^1\text{CH}_3^{\text{IV}}$  whose signals showed significantly broadening upon addition of Fe(III) citrate.

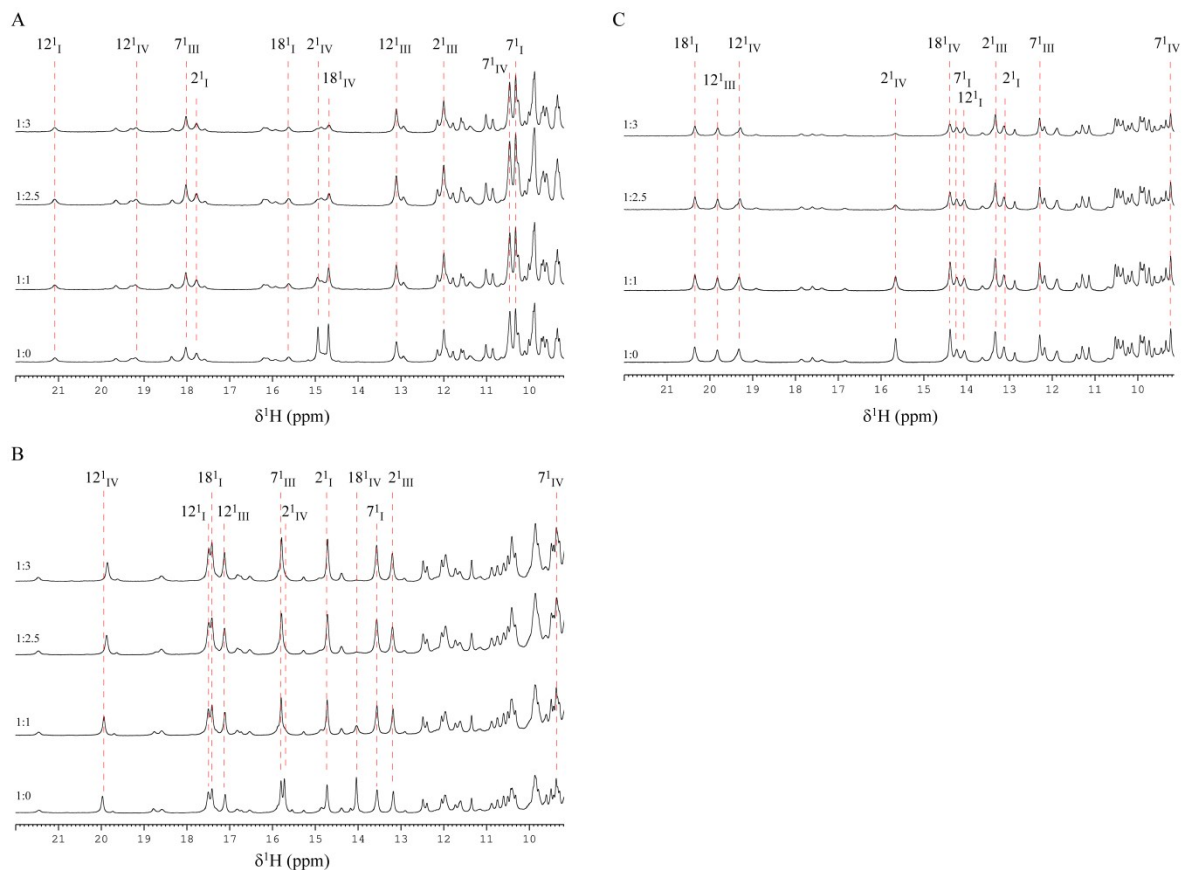

**Fig. S3** Expansions of the low-field region of 1D  $^1\text{H}$  NMR spectra obtained for PpcA, PpcB and PpcE in presence of increasing amounts of Fe(III) citrate in Trizma buffer: A - PpcA, B - PpcB and C - PpcE. The heme methyl signals ( $2^1\text{CH}_3$ ,  $7^1\text{CH}_3$ ,  $12^1\text{CH}_3$  and  $18^1\text{CH}_3$ ) are labeled, with exception of heme methyl  $18^1\text{CH}_3^{\text{III}}$  whose signal appears at a chemical shift of approximately 1 ppm. The cytochrome:Fe(III) citrate ratio used in each experiment is indicated on the left of each spectrum.
